# Supplementary material for: Template-free fabrication of hierarchical graphitic carbon nitride via self-assembled aggregates for enhanced photocatalytic hydrogen evolution activity under visible light
Source: Royal Society of Chemistry journal article supplement (doi:10.1039/d0cy00542h), 2020-01-01
Supplement: d0cy00542h1.pdf [file d0cy00542h1.pdf]

## **Electronic Supplementary Information**

### **Template-free fabrication of hierarchical graphitic carbon nitride via self-assembled aggregates for enhanced photocatalytic hydrogen evolution activity under visible light**

Yingchun Xia, Deqi Wang, Ruixin Jia, Gege Xu, Junjie Zhan, Yanbing Lu,\* and Weijian Xu

College of Chemistry and Chemical Engineering, Hunan University, Changsha 410082, China.

E-mail address: yanbinglu@hnu.edu.cn

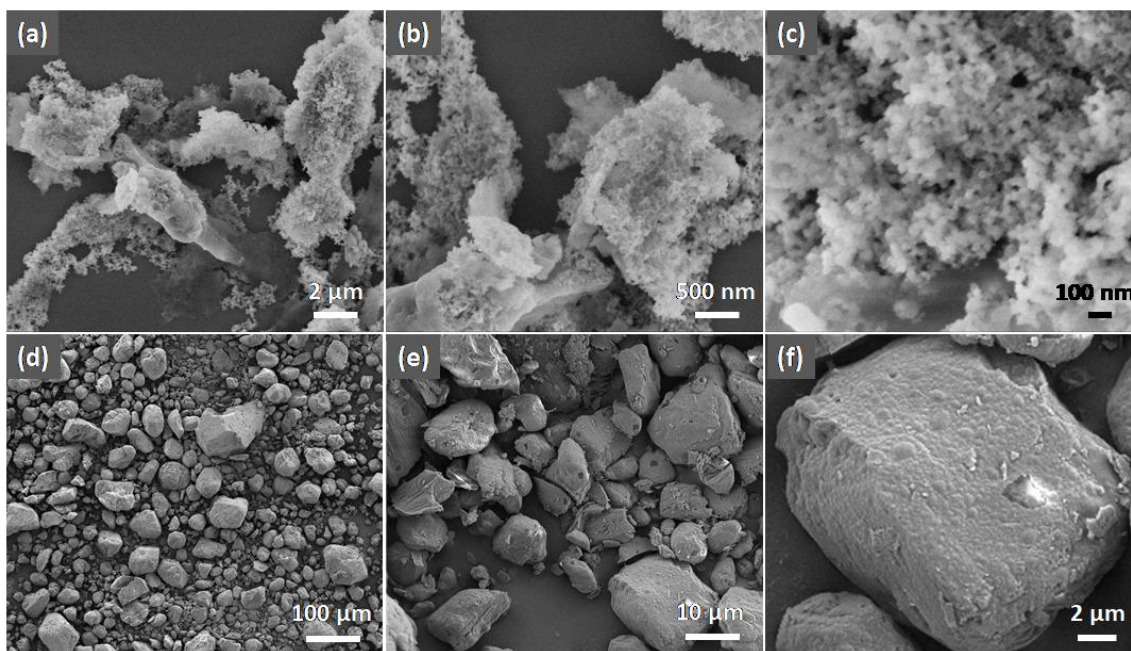

**Fig. S1** Low-resolution (a) and high-resolution (b, c) SEM images of MA; low-resolution (d) and high-resolution (e, f) SEM images of commercial melamine.

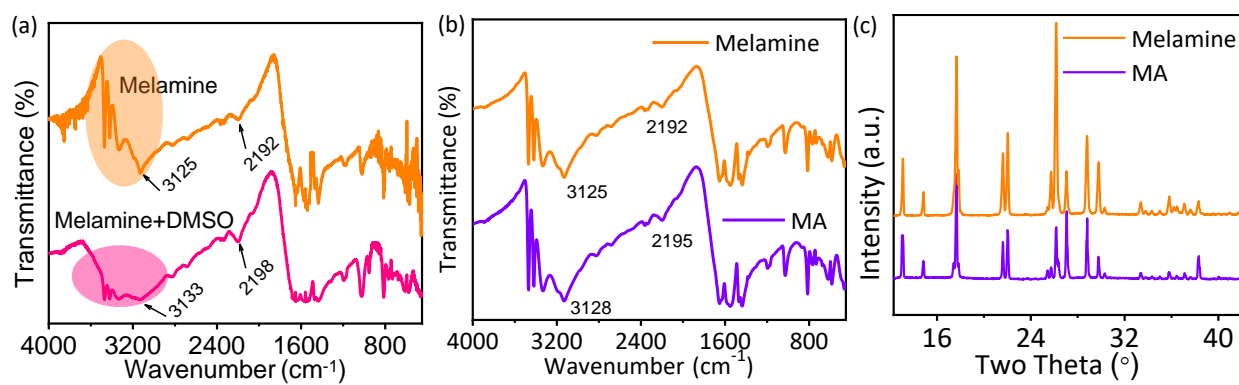

**Fig. S2** (a, b) FT-IR spectra of melamine, “melamine+DMSO”, and MA; (c) XRD pattern of melamine and MA.

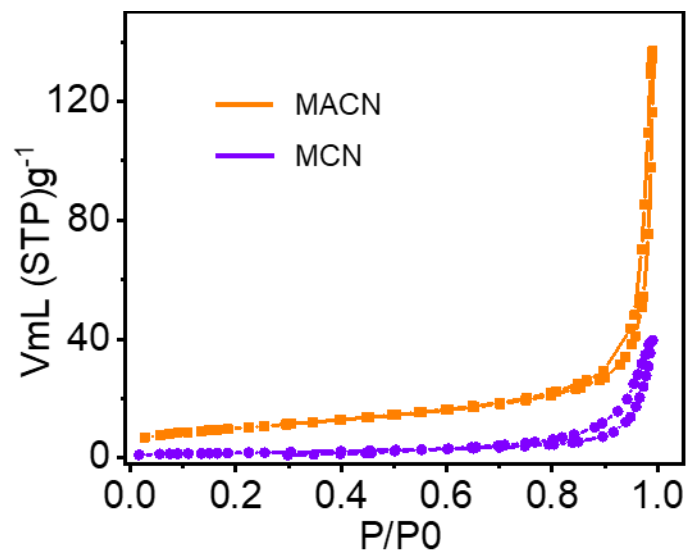

**Fig. S3** Brunner Emmet Teller (BET) specific surface area of MCN and MACN.

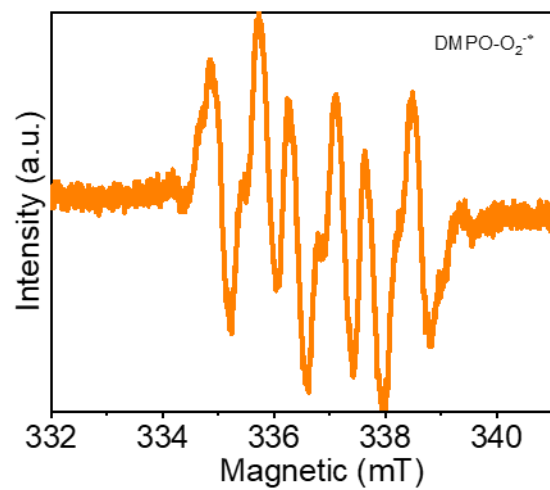

**Fig. S4** ESR spectrum of DMPO-O<sub>2</sub><sup>\*</sup> for MACN in methanol under light irradiation.

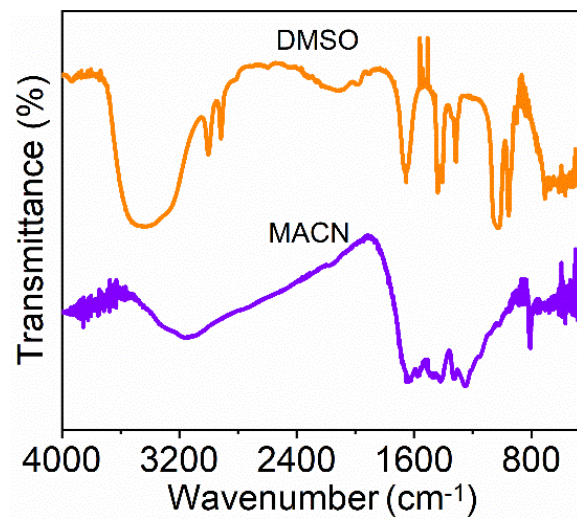

**Fig. S5** FT-IR spectra of DMSO and MACN.

**Table S1** Time-resolved photoluminescence (TR-PL) of MCN and MACN.

| Sample | $\tau_1$ (ns) | $\tau_2$ (ns) | $B_1$ (%) | $B_2$ (%) | $\tau$ (ns) |
|--------|---------------|---------------|-----------|-----------|-------------|
| MACN   | 1.76          | 5.86          | 32.1      | 67.9      | 4.84        |
| MCN    | 2.25          | 10.2          | 34.7      | 65.3      | 6.04        |

**Table S2** Comparison of various catalysts for photocatalytic hydrogen evolution reaction.

| Photocatalyst                                                                | Light source | Co-catalyst       | Solution       | H <sub>2</sub> /μmol·h <sup>-1</sup> ·g <sup>-1</sup> | AQE /%        |
|------------------------------------------------------------------------------|--------------|-------------------|----------------|-------------------------------------------------------|---------------|
| g-C <sub>3</sub> N <sub>4</sub> <sup>1</sup>                                 | λ>420 nm     | Pt                | 20 vol% TEOA   | 5289.9                                                | 32.4 (400 nm) |
| g-C <sub>3</sub> N <sub>4</sub> /In <sub>2</sub> O <sub>3</sub> <sup>2</sup> | λ≥420 nm     | Au                | 10 vol% MeOH   | 5648                                                  | 2.5           |
| g-C <sub>3</sub> N <sub>4</sub> /<br>graphdiyne <sup>3</sup>                 | λ>420 nm     | Pt                | 15 vol% TEOA   | 792                                                   | -             |
| g-C <sub>3</sub> N <sub>4</sub> <sup>4</sup>                                 | λ>420 nm     | Ni <sub>2</sub> P | 10 vol% TEOA   | 2849.5                                                | 18.8 (420 nm) |
| g-C <sub>3</sub> N <sub>4</sub> <sup>5</sup>                                 | λ>420 nm     | Pt                | 10 vol% TEOA   | 1619                                                  | -             |
| g-C <sub>3</sub> N <sub>4</sub> <sup>6</sup>                                 | λ>420 nm     | Pt                | 10 vol% TEOA   | 1540                                                  | 1.1 (420 nm)  |
| g-C <sub>3</sub> N <sub>4</sub> <sup>7</sup>                                 | λ>400 nm     | -                 | TEOA           | 28000                                                 | 23.3 (420 nm) |
| g-C <sub>3</sub> N <sub>4</sub> <sup>8</sup>                                 | UV-visible   | Pt                | 10 vol% TEOA   | 66 (0.3 g)                                            | -             |
| g-C <sub>3</sub> N <sub>4</sub> <sup>9</sup>                                 | λ>420 nm     | Pt                | 10 vol% TEOA   | 13 (0.1 g)                                            | -             |
| g-C <sub>3</sub> N <sub>4</sub> <sup>10</sup>                                | λ≥420 nm     | Pt/CoTPP          | 10 vol% TEOA   | 46.9 (0.05 g)                                         | -             |
| g-C <sub>3</sub> N <sub>4</sub> <sup>11</sup>                                | λ≥400 nm     | Fe <sub>2</sub> N | 10 vol% TEOA   | 88.7                                                  | -             |
| g-C <sub>3</sub> N <sub>4</sub> <sup>12</sup>                                | Solar light  | Carbon/Pt         | 5 vol% TEOA    | 5573                                                  | -             |
| g-C <sub>3</sub> N <sub>4</sub> <sup>13</sup>                                | λ>420 nm     | Ni                | 25 vol% TEOA   | 2989.5                                                | -             |
| g-C <sub>3</sub> N <sub>4</sub> <sup>14</sup>                                | UV-visible   | Cu/THPP           | 16.7 vol% TEOA | 7.5 (0.01 g)                                          | -             |
| g-C <sub>3</sub> N <sub>4</sub> <sup>15</sup>                                | λ≥420 nm     | NHPI/Pt           | 10 vol% TEOA   | 1145.4                                                | 4.86 (420 nm) |
| g-C <sub>3</sub> N <sub>4</sub> <sup>16</sup>                                | λ≥400 nm     | Pt                | 10 vol% TEOA   | 793 (2 mg)                                            | -             |
| Our work                                                                     | λ≥420 nm     | Pt                | 15 vol% TEOA   | 164 (50 mg)                                           | 1.4%          |



**Table S3** BET surface area of MCN and MACN.

| Sample | Specific surface area (m <sup>2</sup> ·g <sup>-1</sup> ) |
|--------|----------------------------------------------------------|
| MCN    | 6.0                                                      |
| MACN   | 35.3                                                     |

## Reference

1. Z. Sun, W. Wang, Q. Chen, Y. Pu, H. He, W. Zhuang, J. He and L. Huang, *Journal of Materials Chemistry A*, 2020.
2. R. K. Chava, J. Do and M. Kang, *Applied Catalysis B: Environmental*, 2019, **248**, 538-551.
3. Q. Xu, B. Zhu, B. Cheng, J. Yu, M. Zhou and W. Ho, *Applied Catalysis B: Environmental*, 2019, **255**, 117770.
4. P. Wen, K. Zhao, H. Li, J. Li, J. Li, Q. Ma, S. M. Geyer, L. Jiang and Y. Qiu, *Journal of Materials Chemistry A*, 2020.
5. H. Zhang, J. Lin, Z. Li, T. Li, X. Jia, X.-L. Wu, S. Hu, H. Lin, J. Chen and J. Zhu, *Catalysis Science & Technology*, 2019, **9**, 502-508.
6. H. Tang, R. Wang, C. Zhao, Z. Chen, X. Yang, D. Bukhvalov, Z. Lin and Q. Liu, *Chem. Eng. J.*, 2019, **374**, 1064-1075.
7. Z. Mo, H. Xu, Z. Chen, X. She, Y. Song, J. Lian, X. Zhu, P. Yan, Y. Lei and S. Yuan, *Applied Catalysis B: Environmental*, 2019, **241**, 452-460.
8. H. Yan, Y. Chen and S. Xu, *Int. J. Hydrogen Energy*, 2012, **37**, 125-133.
9. Y. Wang, Y. Di, M. Antonietti, H. Li, X. Chen and X. Wang, *Chem. Mater.*, 2010, **22**, 5119-5121.
10. M. Kombo, L.-B. Ma, Y.-N. Liu, X.-X. Fang, N. Ullah, A. H. Odda and A.-W. Xu, *Catalysis Science & Technology*, 2019, **9**, 2196-2202.
11. W. Qi, S. Liu, F. Li, H. Jiang, Z. Cheng, S. Zhao and M. Yang, *Catalysis Science & Technology*, 2019, **9**, 2571-2577.
12. A. M. Shaheer, P. Karthik, G. Karthik, M. Shankar and B. Neppolian, *Catalysis Science & Technology*, 2019, **9**, 3493-3503.
13. M. Li, S. Song, C. Su, L. Li, Z. Yan and X. Cao, *Catalysis Science & Technology*, 2019, **9**, 3828-3835.
14. M. Zhang, K. Zhu, L. Qin, S.-Z. Kang and X. Li, *Catalysis Science & Technology*, 2020, **10**, 1640-1649.
15. L.-B. Ma, K. Liang, G. Wang, X.-X. Fang, C. Ling, T. Zhao, M. Kombo, T.-Y. Cheang and A.-W. Xu, *Catalysis Science & Technology*, 2019, **9**, 5441-5446.
16. R. C. Pawar, S. Kang, H. Han, H. Choi and C. S. Lee, *Catalysis Science & Technology*, 2019, **9**, 1004-1012.
